# Supplementary material
Source: publisher figshare collection journal article supplement (https://acs.figshare.com/ndownloader/files/3626526)
Supplement: Supplementary file 1 [file 3626526]

Supporting Information

**High Carrier Mobility and Pronounced Light Absorption in Methyl-Terminated  
Germanene: Insights from First-Principles Computations**

Yu Jing, Xu Zhang, Dihua Wu, Xudong Zhao, Zhen Zhou\*

Tianjin Key Laboratory of Metal and Molecule Based Material Chemistry, Key  
Laboratory of Advanced Energy Materials Chemistry (Ministry of Education),  
Computational Centre for Molecular Science, Institute of New Energy Material  
Chemistry, Collaborative Innovation Center of Chemical Science and Engineering  
(Tianjin), School of Materials Science and Engineering, National Institute for  
Advanced Materials, Nankai University, Tianjin 300071, P. R. China

\*Corresponding Author, Email: zhouzhen@nankai.edu.cn (ZZ).

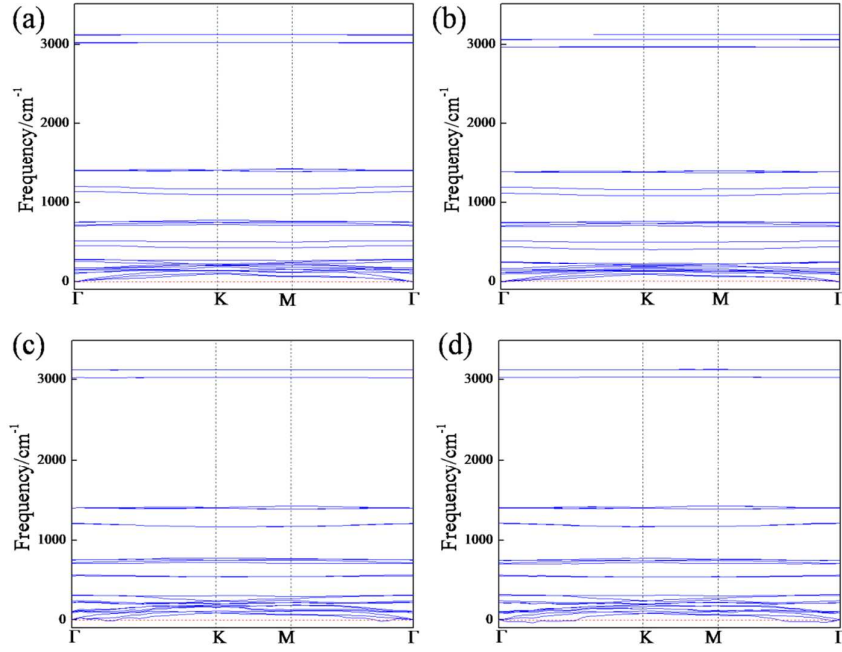

**Figure S1.** Phonon spectrum of  $\text{GeCH}_3$  in a hexagonal primitive cell under no strain (a), 5% biaxial tensile strain (b), 2% biaxial compressive strain (c) and 3% biaxial compressive strain (d).

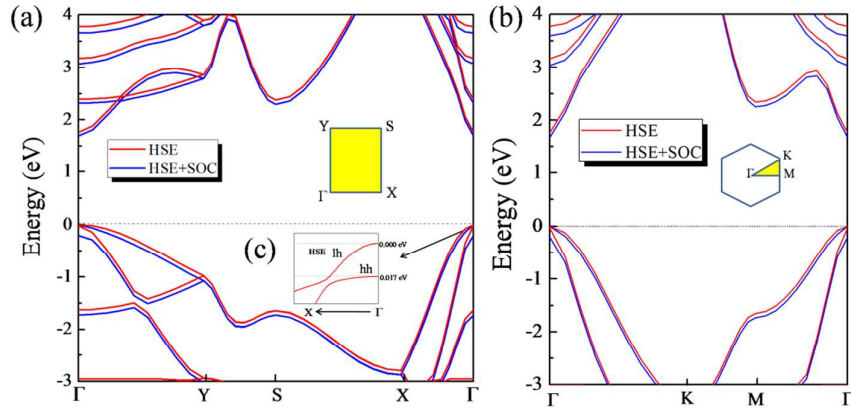

**Figure S2.** Band structure of  $\text{GeCH}_3$  in a tetragonal cell (a) and a hexagonal primitive cell (b) at the HSE level calculated with and without SOC; Enlarged valence bands structure near the  $\Gamma$  point along the armchair direction (c), the heavy and light valence bands corresponding to the heavy hole (hh) and light hole (lh) are labeled inside.

**Table S1.** Effective masses for the heavy holes (hh), light holes (lh) and electrons (e) along the armchair and zigzag directions in the tetragonal and hexagonal cells, calculated with and without SOC effect.

| Cell          | m* <sub>_armchair</sub> |                       |                       | m* <sub>_zigzag</sub> |      |      |
|---------------|-------------------------|-----------------------|-----------------------|-----------------------|------|------|
|               | hh                      | lh                    | e                     | hh                    | lh   | e    |
| Tetra_HSE     | 0.14                    | $2.35 \times 10^{-2}$ | $2.62 \times 10^{-2}$ | 1.36                  | 0.21 | 0.24 |
| Tetra_HSE+SOC | $3.67 \times 10^{-2}$   | $3.67 \times 10^{-2}$ | $2.60 \times 10^{-2}$ | 0.30                  | 0.30 | 0.19 |
| Hexa_HSE+SOC  | $4.11 \times 10^{-2}$   | $4.25 \times 10^{-2}$ | $1.91 \times 10^{-2}$ | 0.23                  | 0.24 | 0.19 |

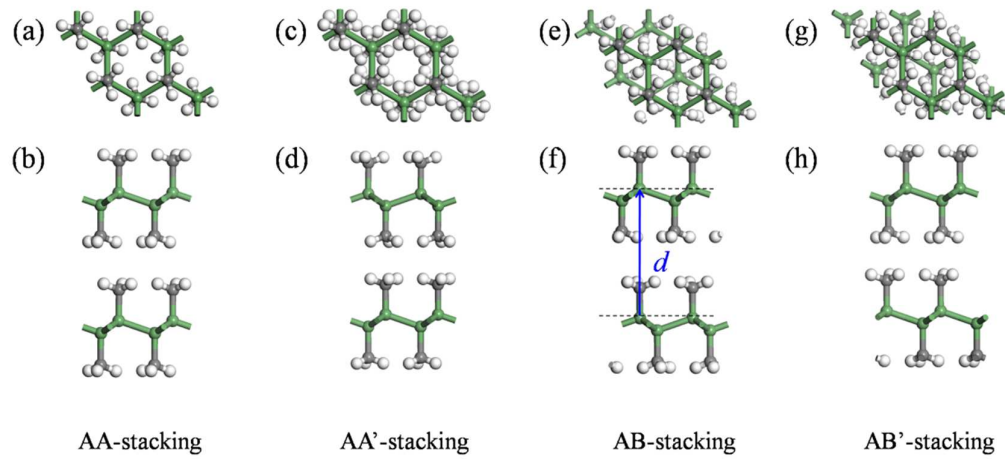

**Figure S3.** Atomic configurations of GeCH<sub>3</sub> bilayer (2×2 supercell of the hexagonal lattice) in different stacking ways, including the AA stacking (a and b), AA'-stacking (c and d), AB-stacking (e and f) and AB'-stacking (g and h), from the top and side views, respectively. The bilayer configurations were calculated in a hexagonal primitive cell instead of the orthogonal supercell to reduce the calculation burden. The interlayer distance ( $d$ ) is labeled in (f).

**Table S2.** Interlayer distance ( $d_{\text{Ge-Ge}}$ ) and binding energy of  $\text{GeCH}_3$  bilayer ( $E_{\text{bind}}$ ) in different stacking configurations.

| Stacking order                  | AA    | AA'  | AB    | AB'  |
|---------------------------------|-------|------|-------|------|
| $d_{\text{Ge-Ge}}$ (nm)         | 0.79  | 0.74 | 0.79  | 0.75 |
| $E_{\text{bind}}(\text{J/m}^2)$ | 0.128 | 0.10 | 0.131 | 0.03 |

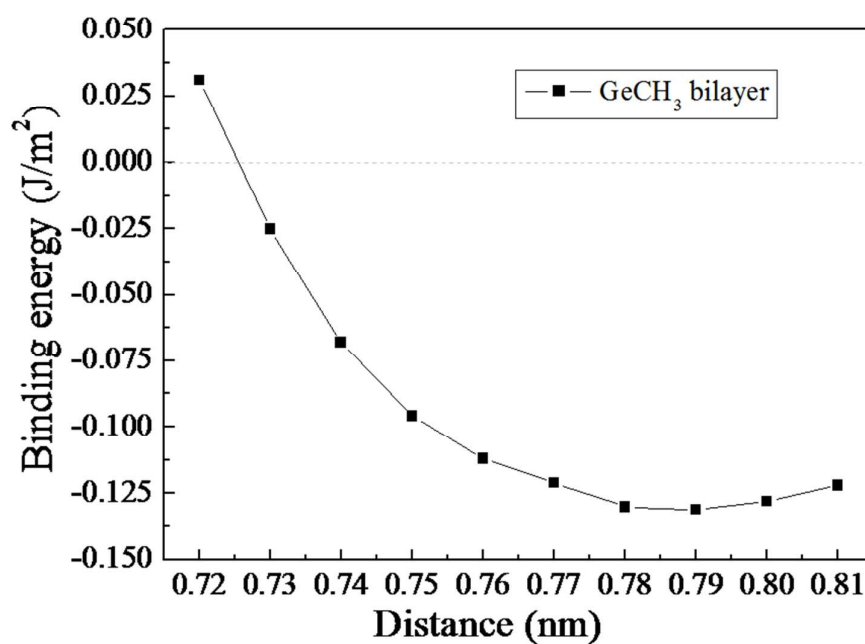

**Figure S4.** Binding energy as a function of the interlayer distance  $d$  in  $\text{GeCH}_3$  bilayer in AB stacking.

As shown in Figure S4, the binding energy of  $\text{GeCH}_3$  bilayer is negative when the interlayer distance (is denoted in Figure S3f) is larger than 0.72 nm. The equilibrium interlayer distance is 0.79 nm, and at this distance the  $\text{GeCH}_3$  bilayer shows the lowest binding energy of 0.13  $\text{J/m}^2$ .

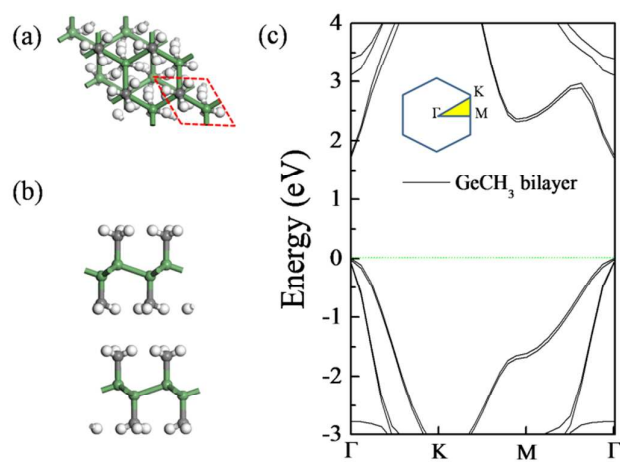

**Figure S5.**  $\text{GeCH}_3$  bilayer ( $2 \times 2 \times 1$  hexagonal supercell) in the most stable configuration (AB-stacking) from the top view (a) and side view (b) and its corresponding band structure (c).
